# Supplementary material
Source: Elsevier journal article supplement (https://www.sciencedirect.com/science/article/pii/S1130862118302298)
Supplement: mmc1 [file S1130862118302298:mmc1.docx]

**Anexo 1. Hoja de ruta para investigador**

1. Presentación inicial

- Presentación del moderador y observador
- Bienvenida y agradecimiento e importancia de la participación en el grupo
- Exponer el propósito de la reunión: “conocer cuáles son los pensamientos y sentimientos que tienen los profesionales en una reanimación, y que  circunstancias pueden favorecer o inhibir comenzar con una reanimación”
- Explicar las similitudes de los participantes
- Fomentar participación y opiniones divergentes
- Asegurar confidencialidad y anonimato desde el principio
- Pedir permiso para grabar en grupo

b. Presentación del grupo

- Una pequeña presentación de los participantes para que todos se conozcan

c. Inicio de la reunión

- El grupo empieza a hablar cuando lo indica el moderador que introduce el tema a tratar, dando posteriormente la palabra al grupo.
- El moderador indica que está ahí para escuchar su opinión o su experiencia acerca del tema propuesto. Dejar claro que la sistemática no es de pregunta y respuesta, sino que el moderador quiere escuchar lo que el grupo quiere decir.
- El grupo tiene la palabra y puede abordar el tema desde la perspectiva que crean conveniente

d. Debate a fondo

- Preguntas temáticas teniendo en cuenta los objetivos de la investigación.

1. ¿Te sientes capaz de realizar una reanimación? ¿Siempre? ¿Qué cosas influyen?
2. ¿Nos sentimos siempre igual a la hora de hacer una reanimación? ¿Qué factores crees que influyen?
3. ¿Crees que influye los éxitos o fracasos anteriores en una RCP?
4. ¿Qué consideras una RCP exitosa? ¿Consideras un “donante a corazón parado  “como un éxito?
5. ¿Tienes siempre un criterio claro sobre en qué momento se debe cesar una  reanimación?
6. Te enfrentas de igual manera a una reanimación con un ritmo desfibrilable que  con un ritmo no desfibrilable?
7. ¿Influye la titulación? ¿Y la formación continuada?
8. ¿Crees que se debería hacer simulacros? ¿Influye si llevas tiempo sin realizar una reanimación?
9. ¿Alguna técnica consideras dificultosa?
10. ¿Piensas que se realizan bien los dos primeros eslabones de una reanimación?
11. Piensan los técnicos que el personal sanitario realiza bien el SVB?
12. ¿Influyen los años de experiencia al enfrentarse a una RCP? ¿En qué sentido?
13. ¿Dónde es más fácil hacer una reanimación? ¿Y en la calle? ¿Y a un familiar  o amigo? ¿Qué otros factores influyen?
14. ¿Influyen las habilidades sociales para dirigir y coordinar una reanimación?
15. ¿Cuál es el estilo de liderazgo mejor en una reanimación? ¿Es fácil conseguirlo? ¿Por qué no se consigue?
16. ¿Qué situaciones son más estresantes en una reanimación?
17. ¿Es importante la comunicación en el equipo?
18. ¿Es mejor tener siempre el mismo equipo o distinto?
19. 19.¿En qué unidad del hospital es más fácil revertir una PCR?¿Y más complicada?
20. ¿Qué puntos consideráis claves para que las personas se sientan capaces de  iniciar una RCP?
21. ¿Cómo valoráis que esté presente la familia durante la reanimación? ¿Es un  motivo de estrés?
22. ¿Qué piensas durante una reanimación? ¿Qué sentimientos tienes?

e. Cierre

- Resumen de los principales temas emergidos
- Ronda final por si alguien quiere aportar algo más
- Informar qué se hará con los resultados
- Agradecer la participación.
